# Supplementary material for: Potential Use of Incineration Bottom Ash in Construction: Evaluation of the Environmental Impact
Source: Springer Nature journal article supplement (doi:10.1007/s12649-020-01086-2), 2020-05-14

# Electronic supplementary material

## Waste and Biomass Valorization, Springer

### Potential use of incineration bottom ash in construction – Evaluation of the environmental impact

**Ute Kalbe and Franz-Georg Simon**

Bundesanstalt für Materialforschung und -prüfung (BAM), Unter den Eichen 87,  
12205 Berlin, Germany

Corresponding author: ute.kalbe@bam.de

**Table S1: Composition of artificial rainwater (AR)**

| Substance                                 | Concentration<br>( $\mu\text{mol/L}$ ) |
|-------------------------------------------|----------------------------------------|
| KCl                                       | 40.0                                   |
| $\text{CaSO}_4 \cdot 2\text{H}_2\text{O}$ | 50.0                                   |
| $\text{NH}_4\text{Cl}$                    | 39.9                                   |
| $\text{NaNO}_3$                           | 60.0                                   |
| $\text{MgSO}_4 \cdot 7\text{H}_2\text{O}$ | 10.0                                   |
| $\text{HNO}_3$ (63%)                      | 2.0                                    |
| pH                                        | 5.7                                    |

**Fig. S1: Concentrations of chloride and calcium in leachate fractions taken from two replicates of laboratory-scaled lysimeter experiments (Lys1, Lys2) at increasing L/S (liquid to solid) ratios**

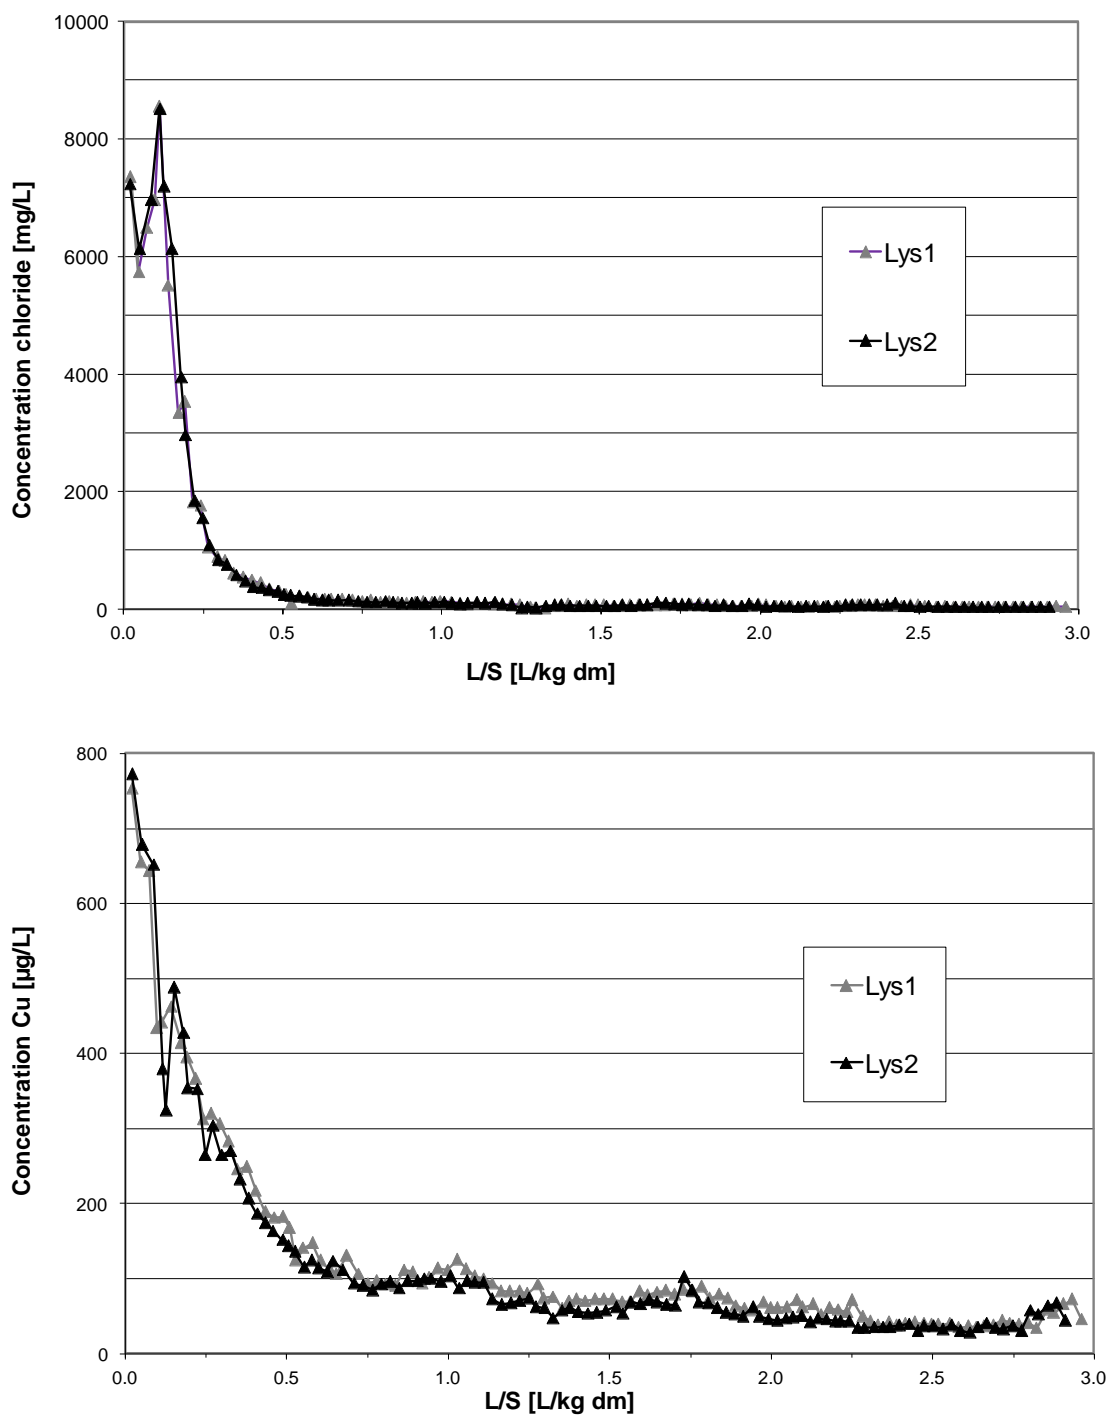

**Fig. S2: Concentration of substances in eluate fractions taken from column percolation experiments (two replicates S1, S2) at increasing L/S ratios using demineralized water MilliQ) and artificial rain (AR) as eluent**

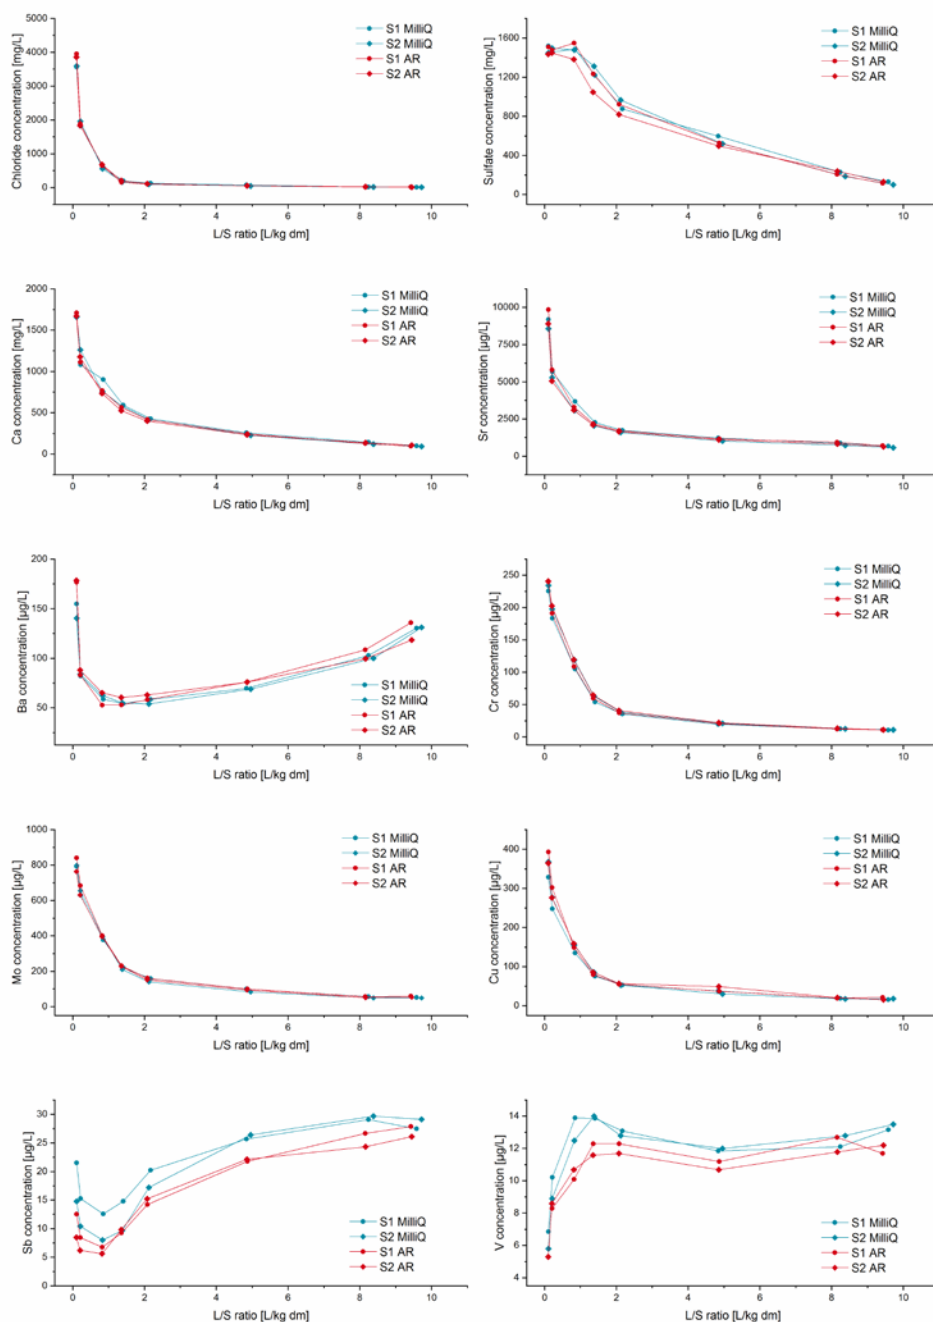

**Figure S3: Cumulative release of substances as a function of L/S ratio in column percolation experiments (two replicates S1, S2) using demineralized water (MilliQ) and artificial rain (AR) as eluent**

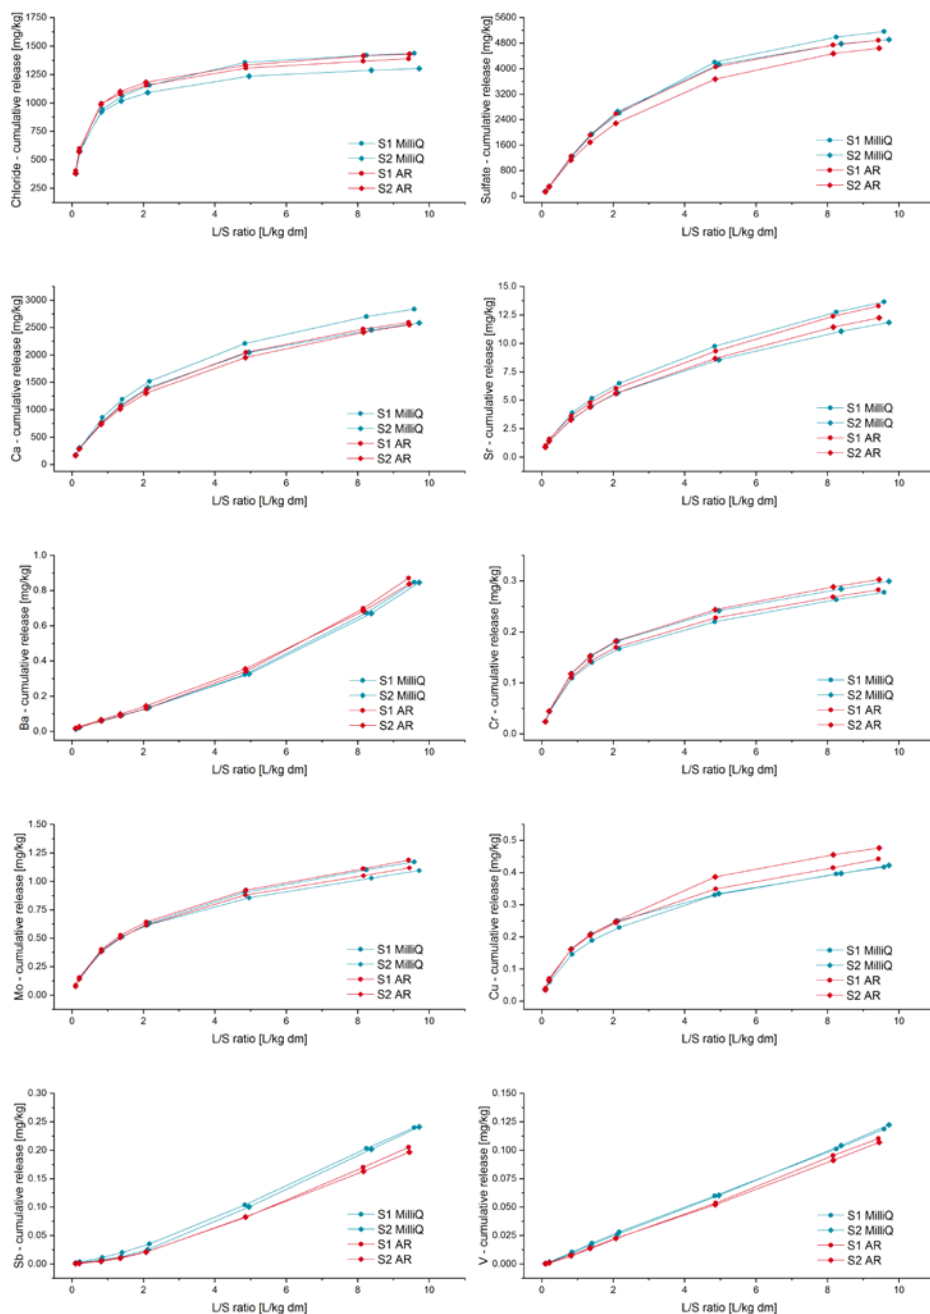

**Fig. S4: Concentration of substances in eluate fractions taken at increasing L/S ratios in lysimeter experiments using artificial rain (AR) as eluent (two replicates Lys1, Lys2)**

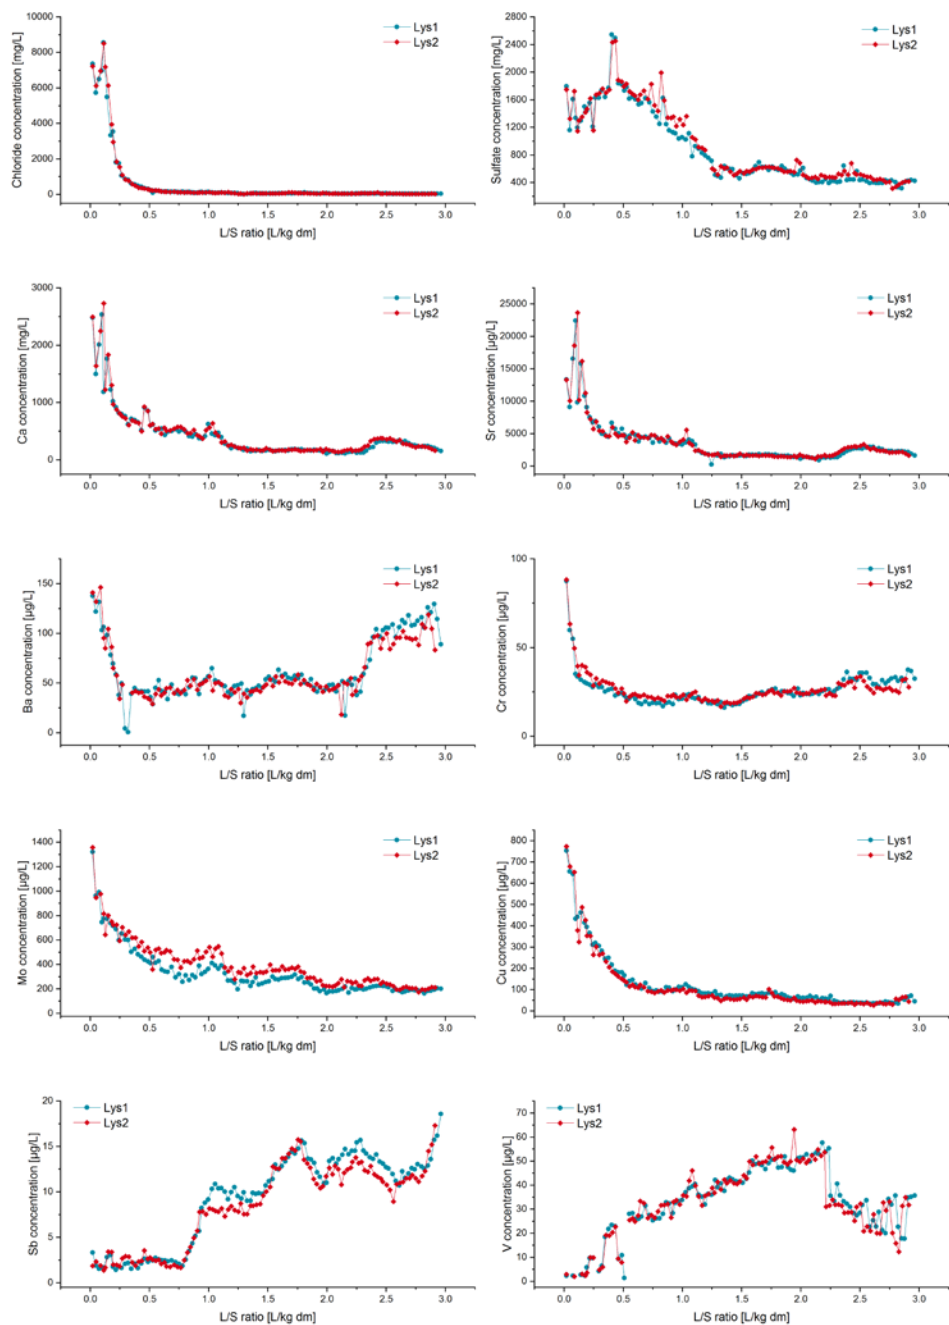

**Fig. S5: Cumulative release of substances as a function of L/S ratio in a lysimeter experiments using artificial rain (AR) as eluent (two replicates Lys1, Lys2)**

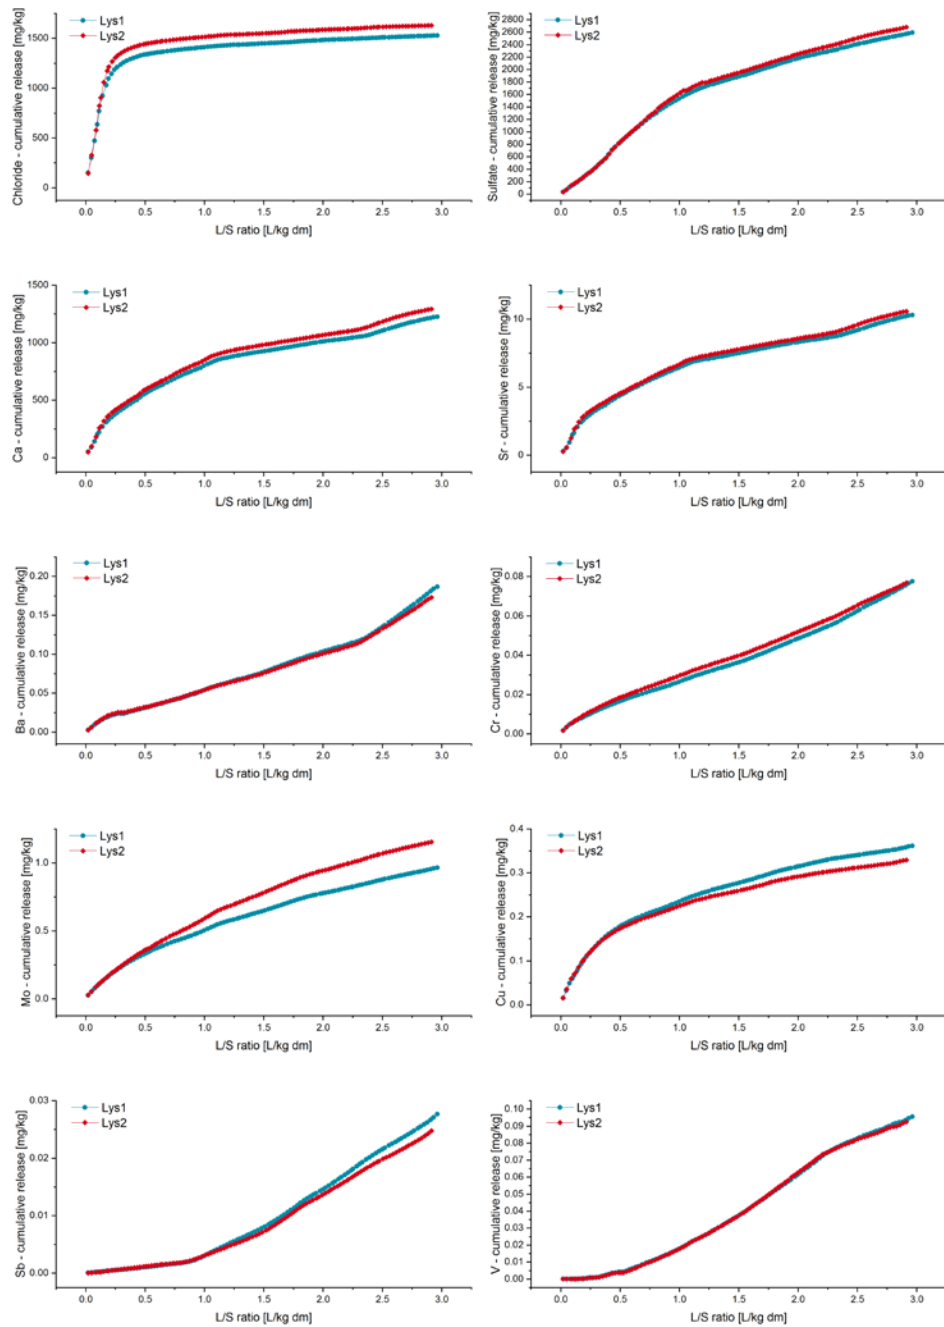

Supplement: MOESM1 [file 12649_2020_1086_MOESM1_ESM.pdf]
